# Supplementary material
Source: PubMed Central journal article supplement (PMC3170139)
Supplement: NIHMS319577-supplement-supplement_1.pdf [file NIHMS319577-supplement-supplement_1.pdf]

## **SUPPLEMENTARY MATERIAL**

**Fig. S1.** Absence of association of plasma oxysterols with plasma cholesterol or anti-oxidant capacity.

**Fig. S2.** Free cholesterol levels and LDL-stimulated cholesterol esterification in skin fibroblasts from NPC1 subjects.

**Table S1.** Plasma oxysterols in NPC1 subjects.

Type of file: figure

Label: S1, F1, F2

Filename: Ory\_Supplemental figures 10.25.10.pdf

**Table S1****Plasma oxysterols in NPC1 subjects**

| Oxysterol                                                                 | ng/ml $\pm$ SEM   |
|---------------------------------------------------------------------------|-------------------|
| <b>7<math>\alpha</math>-HC</b>                                            | 63.4 $\pm$ 11.5   |
| <b>7<math>\beta</math>-HC</b>                                             | 214.6 $\pm$ 31.8  |
| <b>4<math>\beta</math>-HC</b>                                             | 125.5 $\pm$ 46.2  |
| <b>3<math>\beta</math>,5<math>\alpha</math>,6<math>\beta</math>-triol</b> | 358.0 $\pm$ 164.0 |
| <b>27-HC</b>                                                              | 77.7 $\pm$ 34.2   |
| <b>24(S)-HC</b>                                                           | 63.1 $\pm$ 23.0   |
| <b>20-S</b>                                                               | 31.4 $\pm$ 7.4    |
| <b>25-HC</b>                                                              | 7.3 $\pm$ 2.0     |
| <b>7<math>\alpha</math>,27-HC</b>                                         | 6.8 $\pm$ 1.3     |
| <b>7<math>\beta</math>,27-HC</b>                                          | 3.9 $\pm$ 0.9     |
| <b>6-KC</b>                                                               | 22.2 $\pm$ 7.3    |
| <b>7-KC</b>                                                               | 804.1 $\pm$ 148.5 |

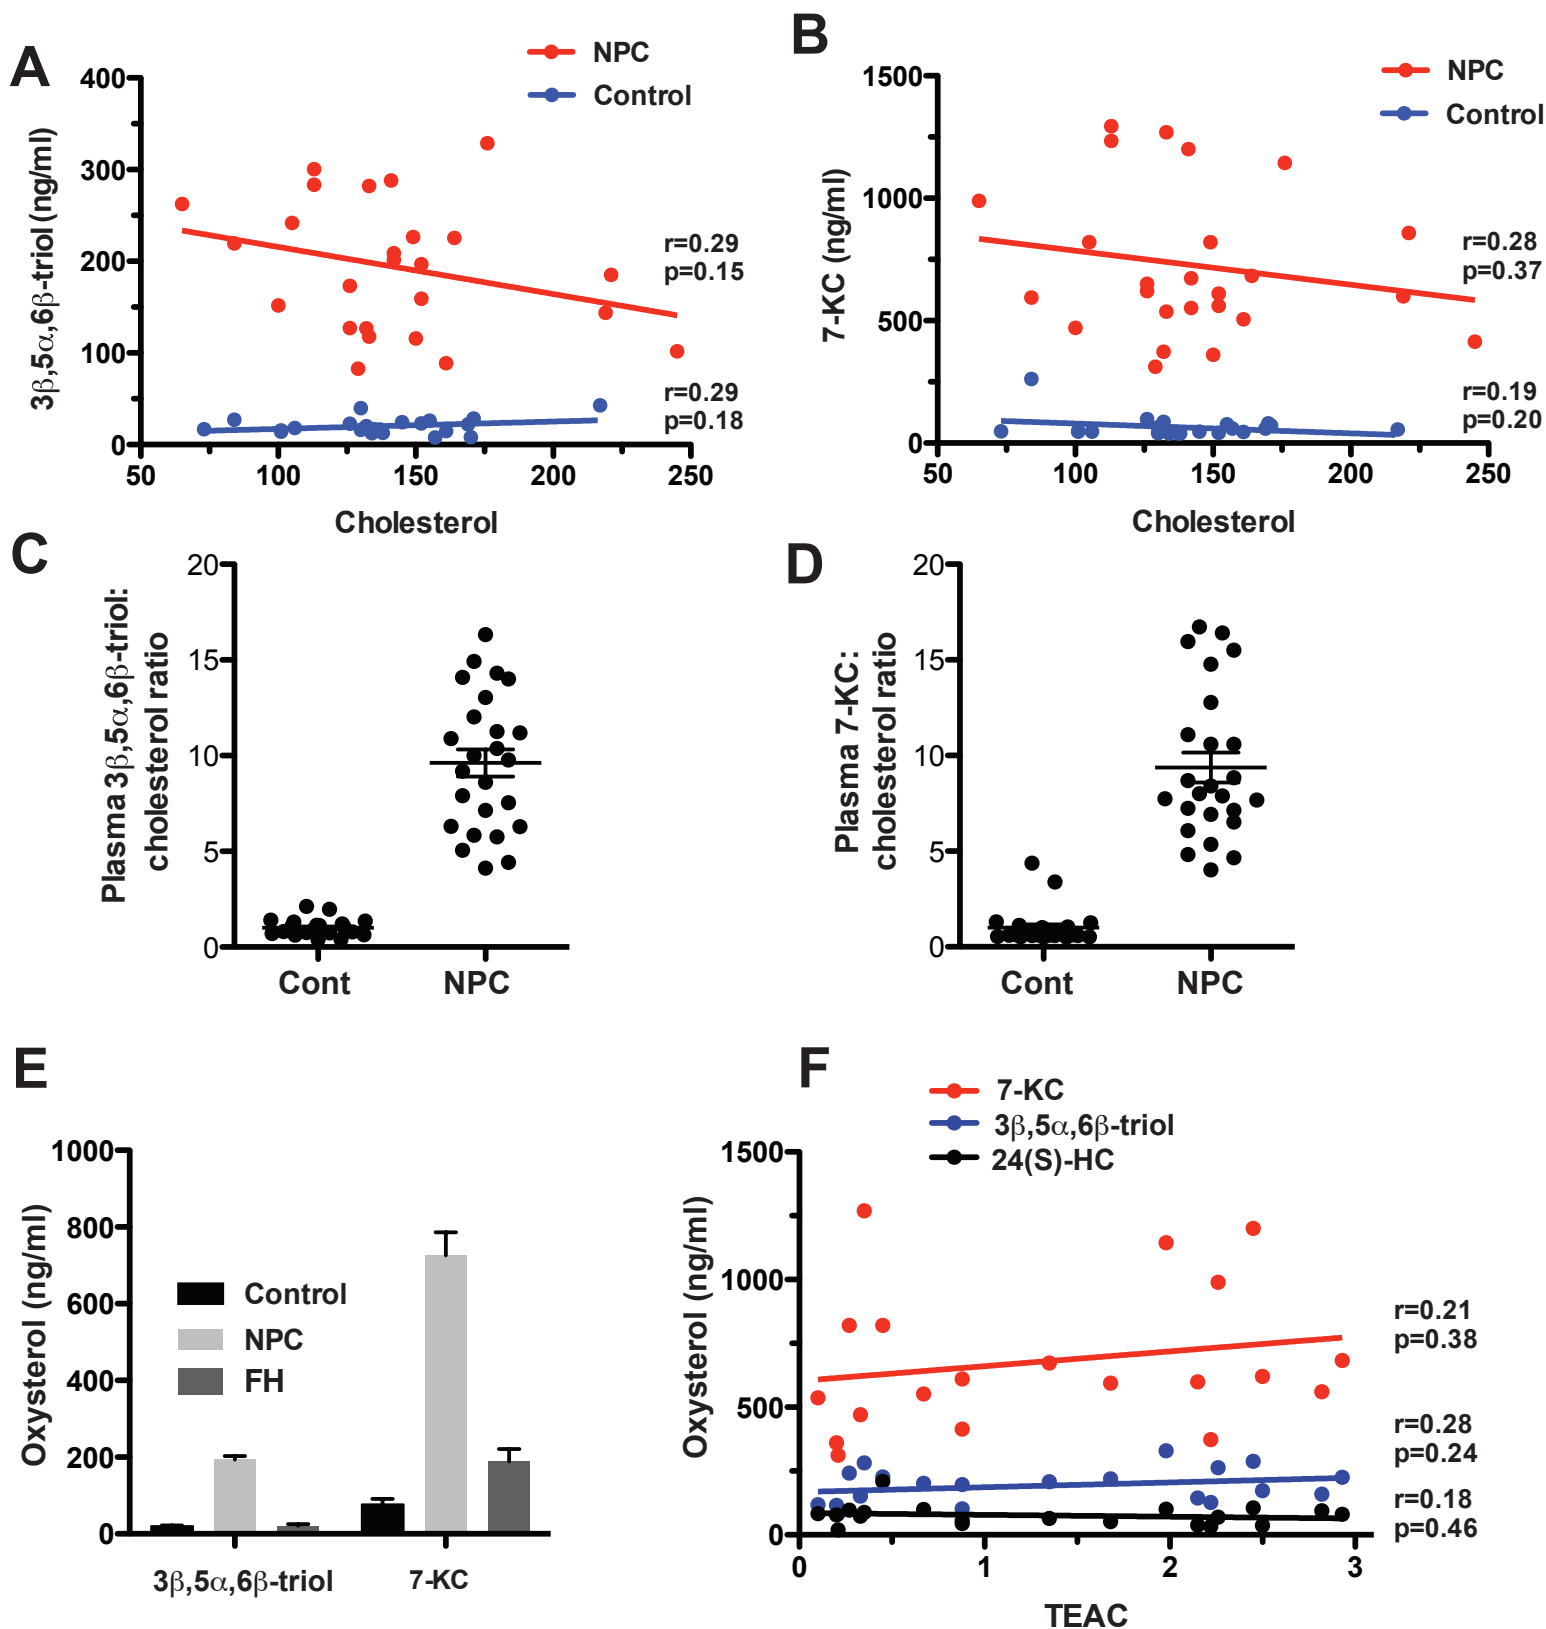

**Fig. S1.** Absence of association of plasma oxysterols with plasma cholesterol or anti-oxidant capacity. (A) Plasma 3 $\beta$ ,5 $\alpha$ ,6 $\beta$ -triol and (B) 7-KC levels in control and NPC1 subjects correlated with plasma total cholesterol levels. (C) Plasma 3 $\beta$ ,5 $\alpha$ ,6 $\beta$ -triol and (D) 7-KC levels in control and NPC1 subjects normalized to plasma total cholesterol levels. (E) Comparison of plasma 3 $\beta$ ,5 $\alpha$ ,6 $\beta$ -triol and 7-KC levels in control, NPC1 and Familial Hypercholesterolemia subjects. (F) Correlation of plasma 3 $\beta$ ,5 $\alpha$ ,6 $\beta$ -triol, 7-KC and 24(S)-HC levels with Trolox equivalent antioxidant capacity (TEAC) of plasma in NPC1 subjects.

**A**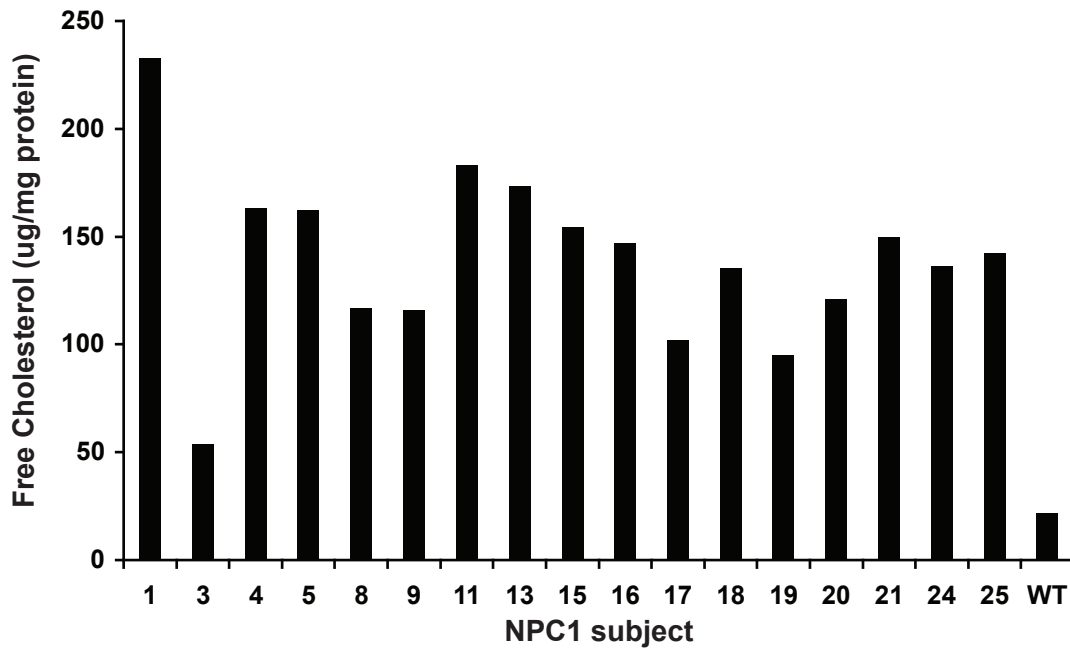**B**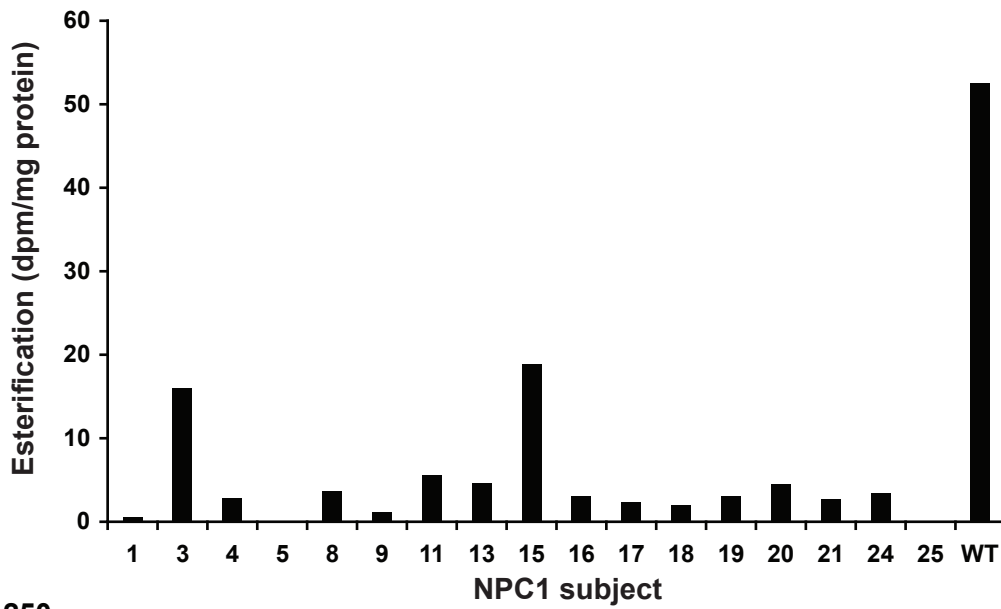**C**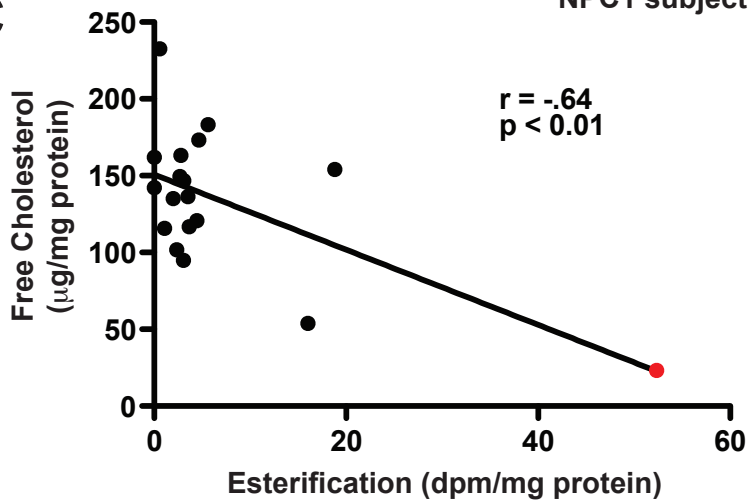

**Fig. S2.** Free cholesterol levels and LDL-stimulated cholesterol esterification in skin fibroblasts from NPC1 subjects. (A) Free cholesterol levels in skin fibroblasts cultured for 48h under lipoprotein-deficient conditions. (B) Rates of LDL-stimulated cholesterol esterification in skin fibroblasts from NPC1 subjects. (C) Correlation of rates of LDL-stimulated cholesterol esterification with free cholesterol accumulation in fibroblasts obtained from NPC1 subjects. Red symbol indicates WT fibroblasts.  $p < 0.01$ .
